# Supplementary material for: Exploiting perylene- and naphthalene-based planar aromatic n-type dopants for SWCNT cathodes in inverted perovskite solar cells
Source: Royal Society of Chemistry journal article supplement (doi:10.1039/d5el00171d), 2025-12-01
Supplement: d5el00171d2.pdf [file d5el00171d2.pdf]

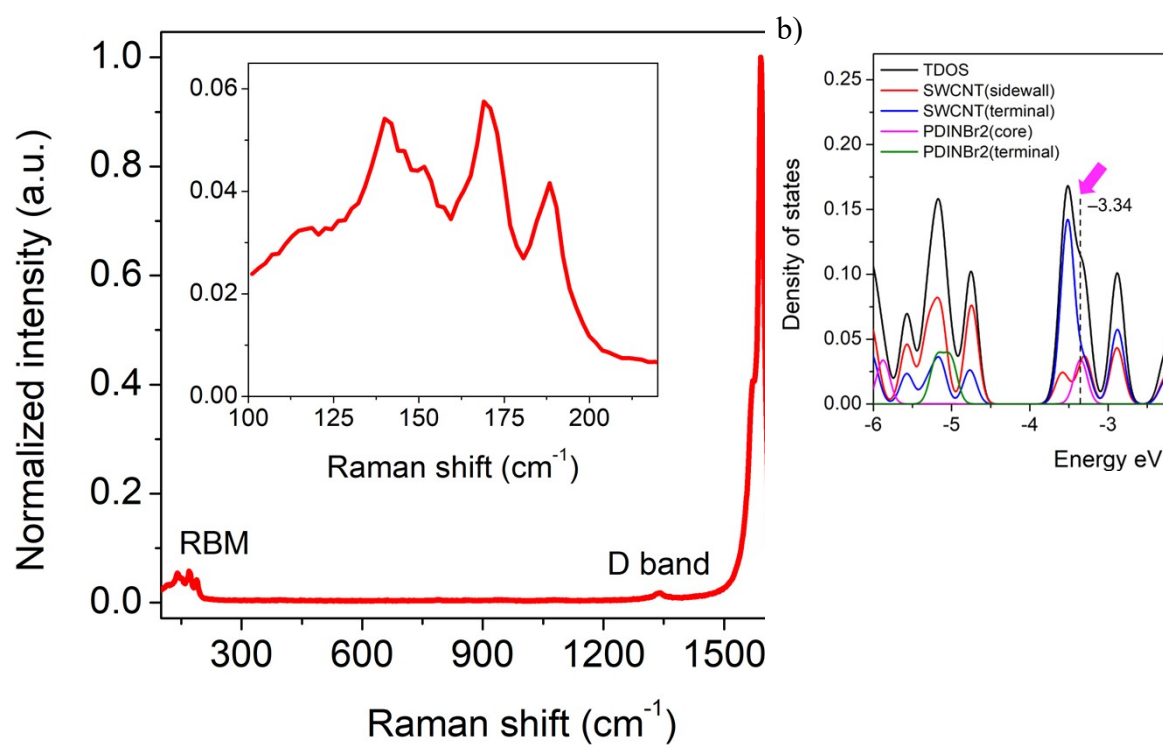

**Figure A.** The Raman spectrum of the SWCNT film, RBM modes ( $100 - 200 \text{ cm}^{-1}$ ) shown in the inset.

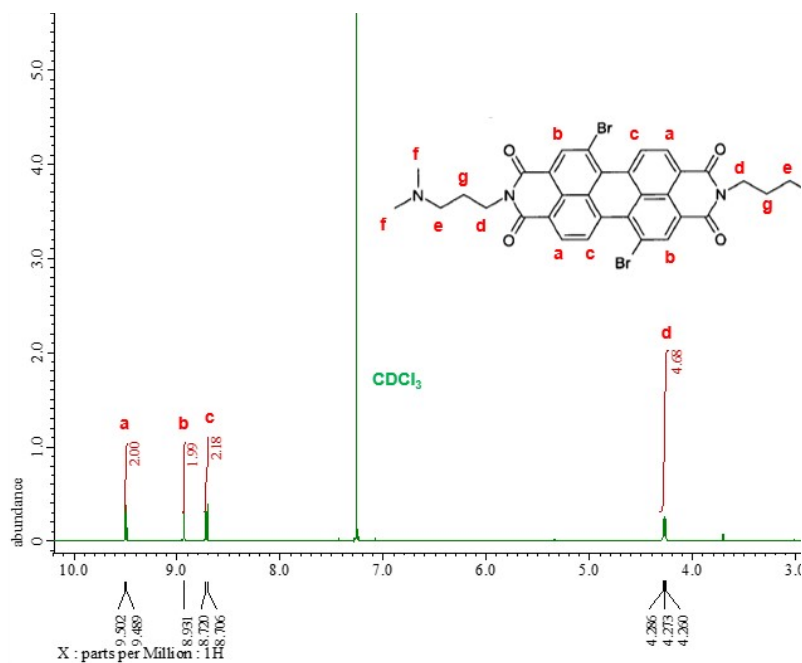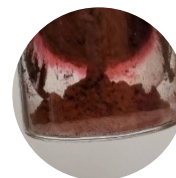

**Figure B.** The  $^1\text{H}$  NMR spectra of PDINBr<sub>2</sub>.

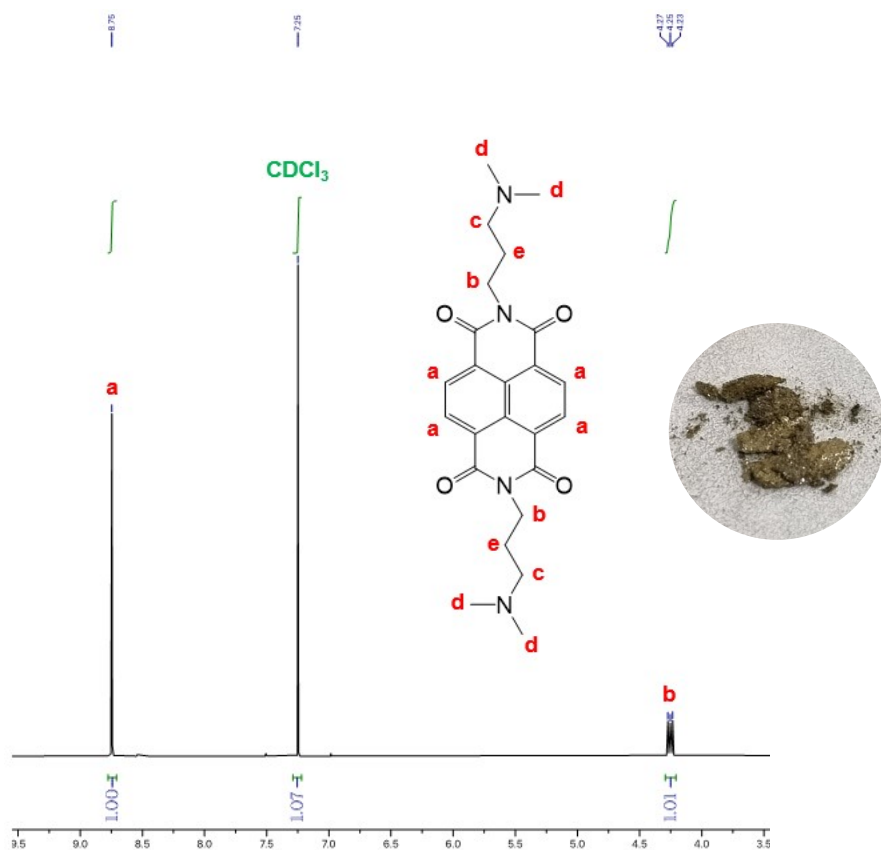

**Figure C.** The  $^1\text{H}$  NMR spectra of NDIN.

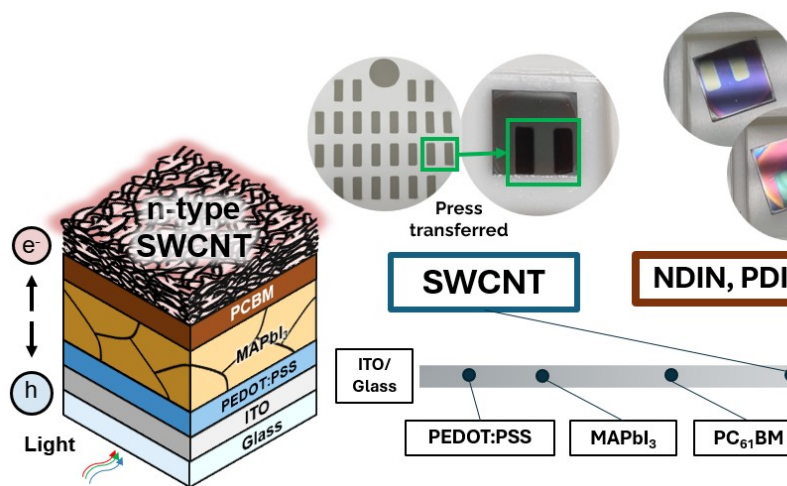

**Figure D.** Perovskite solar cell fabrication process.

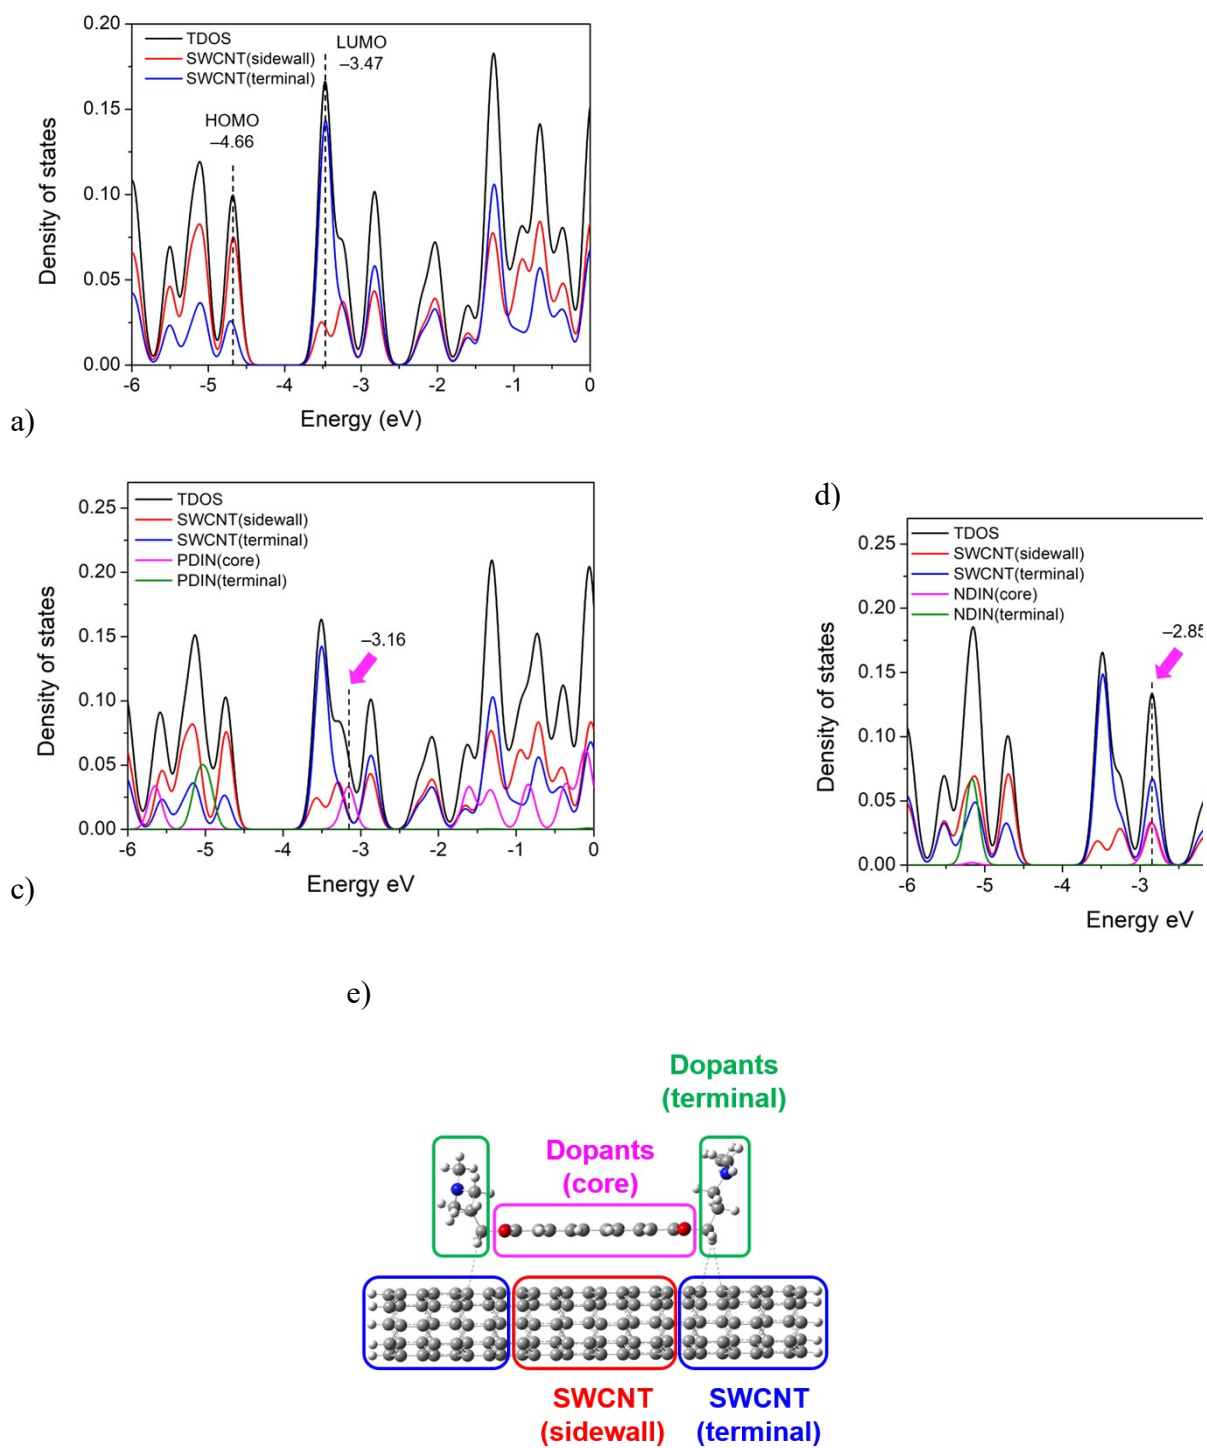

**Figure S1.** Partial density of states (PDOS) of (a) the pristine SWCNT, (b–d) SWCNT–dopant complexes, with the decomposition based on (c) the corresponding structural fragmentation.

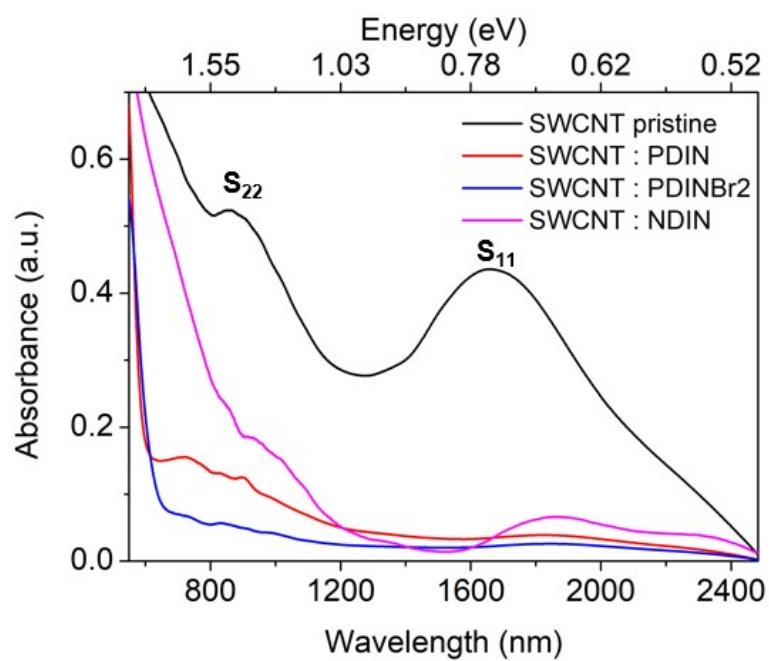

**Figure S2.** Near-infrared (NIR) absorption spectra of pristine and n-doped SWCNT films.

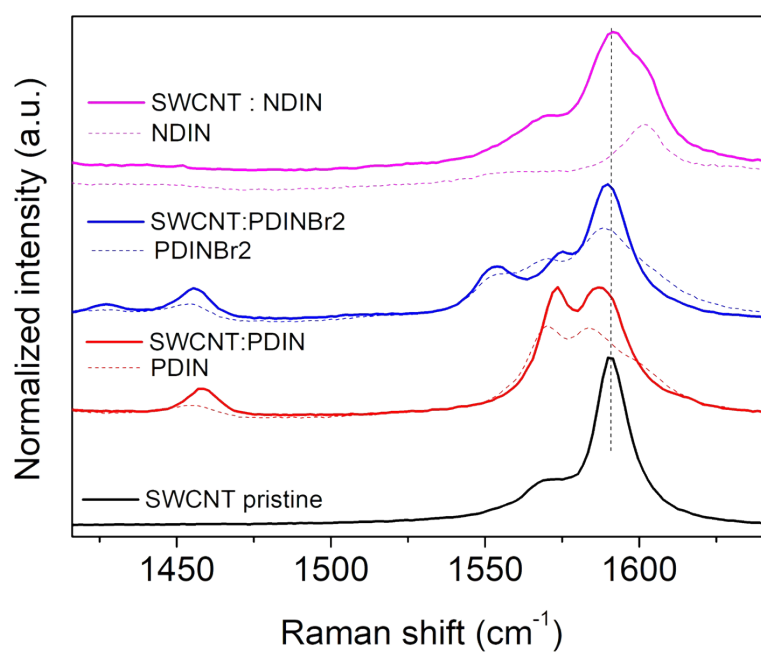

**Figure S3.** Raman spectra of pristine and n-doped SWCNT films compared to their corresponding dopants.

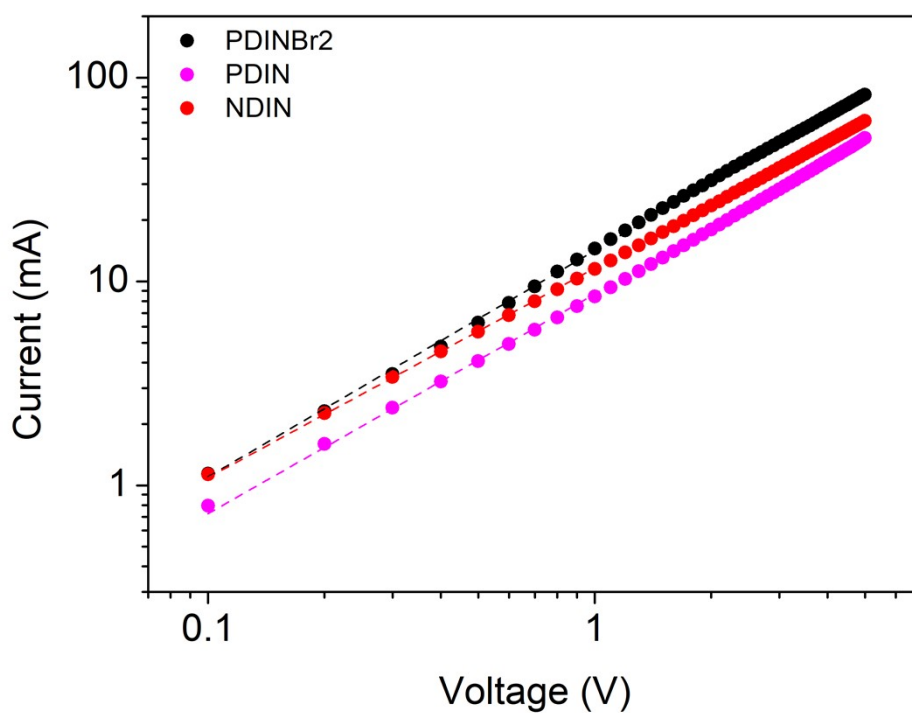

**Figure S4.** Dark  $\log(I)$ – $\log(V)$  characteristics of ITO/SWCNT:dopant/Ag device. The trap-free SCLC region were fitted and their intercept was used to calculate the carrier mobility ( $\mu$ ).<sup>9</sup>

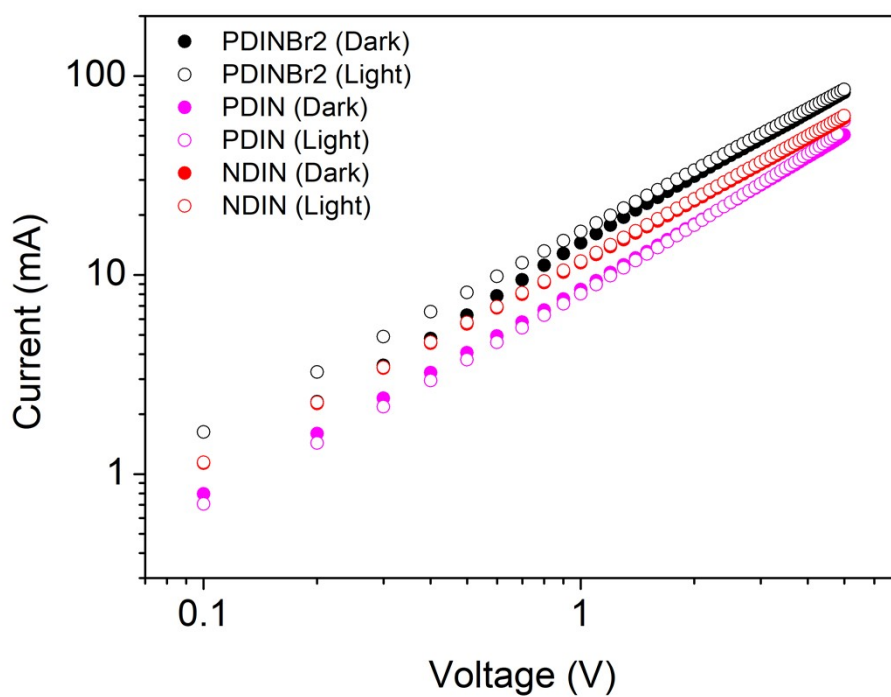

**Figure S5.** Dark current-voltage ( $I$ – $V$ ) plot of pristine and doped SWCNT films (with PDIN, PDINBr<sub>2</sub>, and NDIN) measured under dark and illuminated (1 sun) conditions.

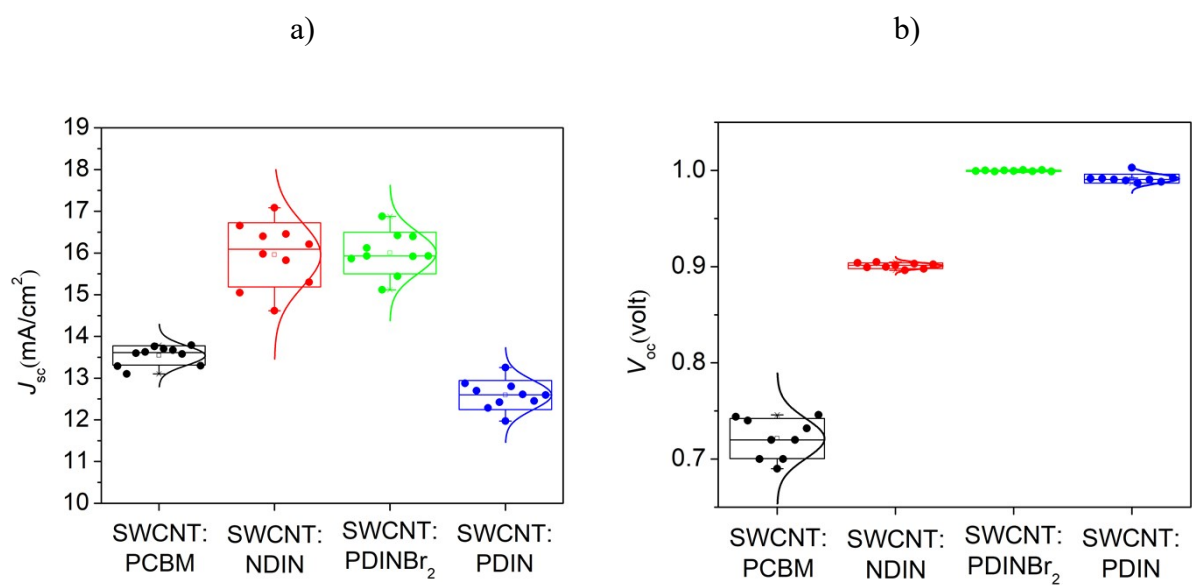

**Figure S6.** PSC device statistical distributions of (a) short-circuit current density, and (b) open-circuit voltage compared among dopants (n = 10).

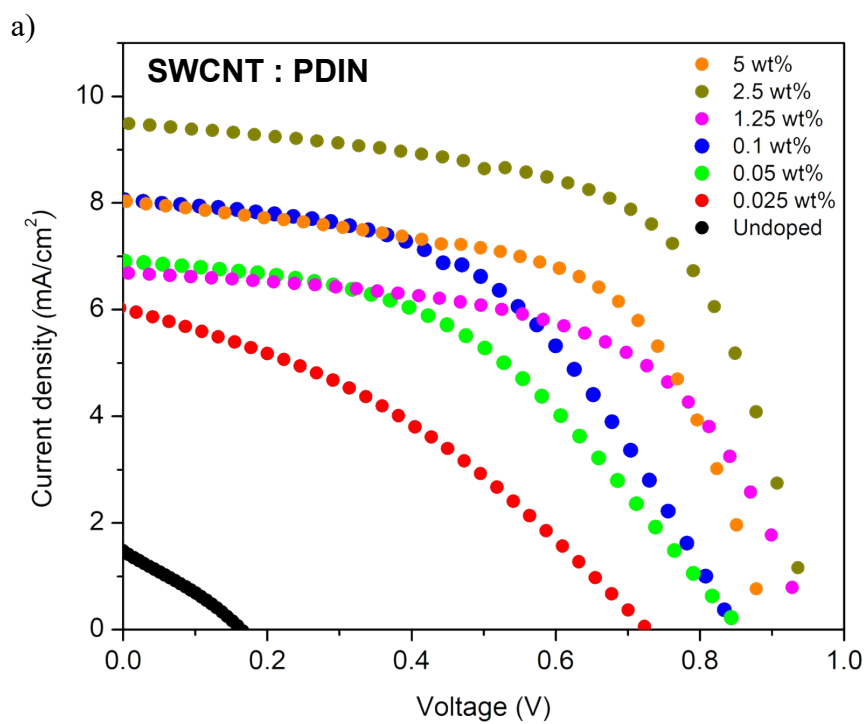

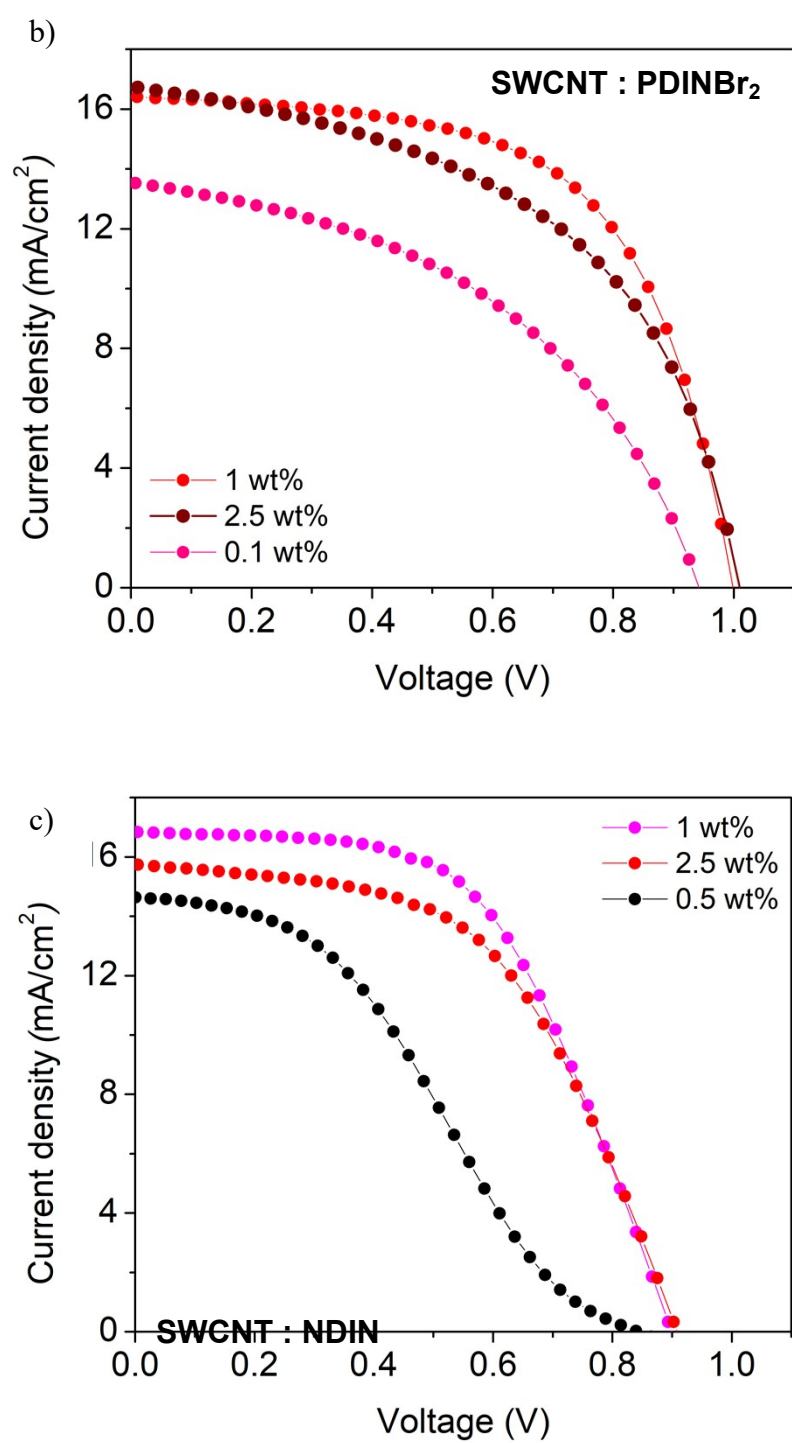

**Figure S7.** *J*–*V* characteristics of PSCs employing (a) PDIN, (b) PDINBr<sub>2</sub>, and (c) NDIN-doped SWCNT cathodes with different dopant concentrations.



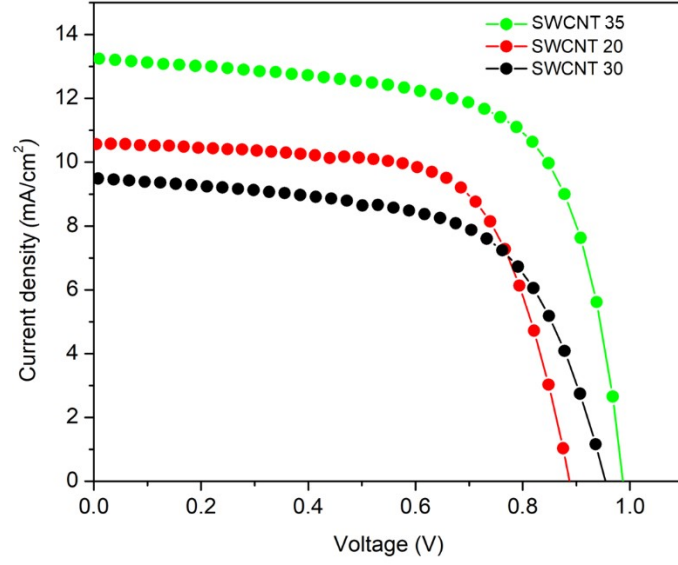

**Figure S8.**  $J$ - $V$  characteristics of PSCs employing PDIN-doped SWCNT cathodes with different SWCNT transmittance ( $T$ ) = 35%, 30%, and 20%.

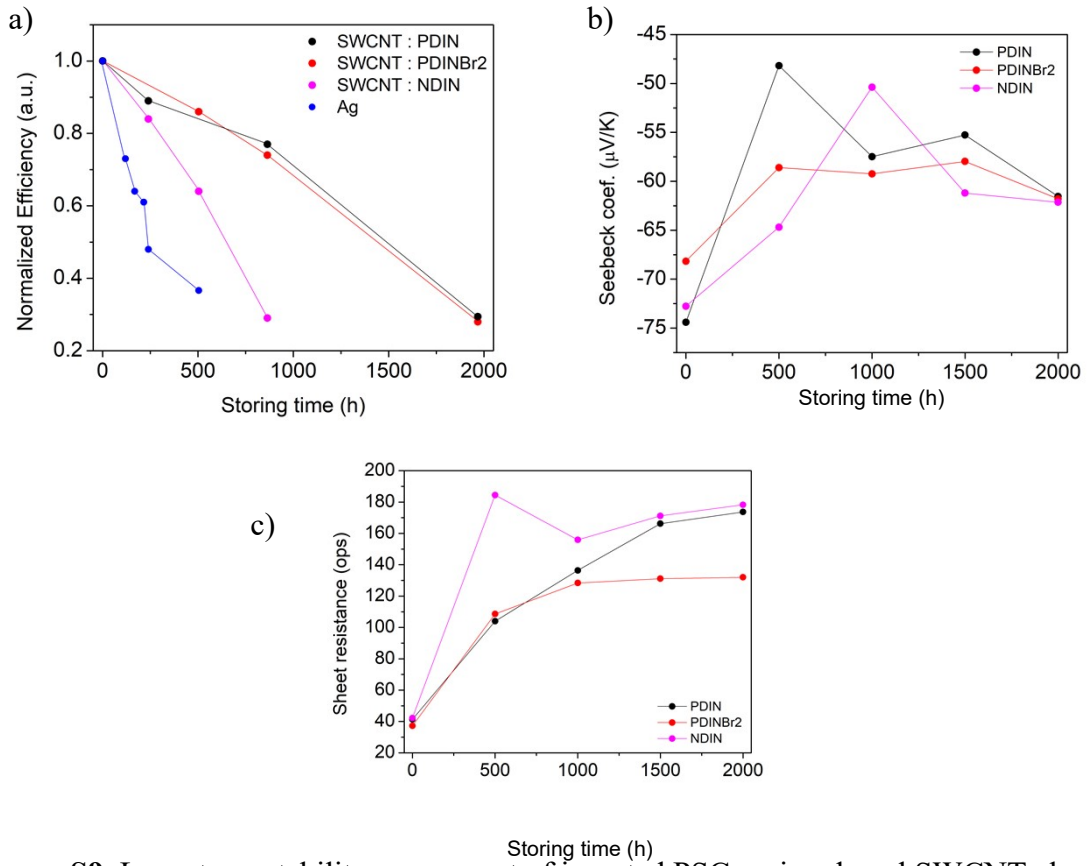

**Figure S9.** Long-term stability assessment of inverted PSCs using doped SWCNT electrodes

(a) Normalized PCE, (b)  $S$ , and (c)  $R_{\text{Sheet}}$  of doped SWCNT films.
